# Supplementary material
Source: PubMed Central journal article supplement (PMC5527653)
Supplement: AAC.00605-17_zac008176401s1.pdf [file AAC.00605-17_zac008176401s1.pdf]

1 Supplementary Table 1. Clinical data of HIV-subjects from the case:control study.

| Characteristics                         | LR-subjects<br>(n=19) | HR-subjects<br>(n=19) | <i>p</i>     |
|-----------------------------------------|-----------------------|-----------------------|--------------|
| Male sex, n/n (%)                       | 19/19 (100)           | 19/19 (100)           | 1            |
| Age (years)                             | 39 [33-54]            | 40 [34-49]            | 0.8          |
| CD4 counts (cells/ $\mu$ L)             | 70 [56-140]           | 126 [46-165]          | 0.28         |
| CD4/CD8 ratio <sup>A</sup>              | 0.08 [0.04-0.15]      | 0.12 [0.07-0.22]      | <b>0.026</b> |
| VL (log HIV RNA copies/mL)              | 4.8 [4.2-5.2]         | 5.0 [4.6-5.7]         | 0.23         |
| Time to diagnosis (months)              | 1.0 [0-2.2]           | 1.0 [0-4.0]           | 0.26         |
| IDU transmission, n/n (%)               | 2/19 (10%)            | 3/19 (16%)            | 0.6          |
| Previous C event, n/n (%)               | 5/19 (26)             | 6/19 (32)             | 0.7          |
| Anti-HVC <sup>B</sup> , n/n (%)         | 3/17 (18)             | 1/18 (6)              | 0.26         |
| X4-viral tropism <sup>C</sup> , n/n (%) | 5/16 (31)             | 2/17 (12)             | 0.17         |

2 Continuous variables are expressed as median values (IQR) and categorical variables  
3 are expressed as number of cases (%). VL, Viral Load; IDU, Intravenous Drug User.  
4 Mann-Whitney U and Chi-squared tests were used to analyze continuous and  
5 categorical variables, respectively. <sup>A</sup>Calculated using frequencies from flow-cytometry.  
6 <sup>B</sup>Data only available from 17 LR-subjects and 18 HR-subjects. <sup>C</sup>Data only available  
7 from 16 LR-subjects and 17 HR-subjects.

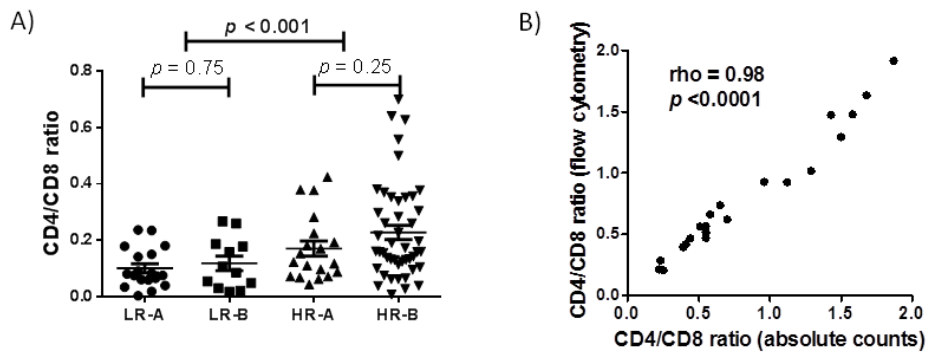

Supplementary Figure 1

8

9 Supplementary Figure 1. Comparison between the CD4/CD8 ratio in the two different  
 10 groups of LR- and HR-subjects. In the case:control study (LR-A and HR-A), CD4 and  
 11 CD8 T-cell frequency determined by flow-cytometry were used to calculate the  
 12 CD4/CD8 ratio, whereas in additional subjects from the Virgen del Rocío Hospital (LR-  
 13 B and HR-B), clinical data of CD4 and CD8 T-cell absolute counts were used to  
 14 calculate CD4/CD8 ratio (A). Mann-Whitney U-test was used for comparison. An  
 15 additional group of HIV subjects, also from the Virgen del Rocío Hospital, had  
 16 available CD4 and CD8 data from both, absolute values and cytometry values, and the  
 17 correlation between such paired data of CD4/CD8 ratios was performed (B). Spearman  
 18 rank test was used for the correlation.

19 SUPPLEMENTAL MATERIAL

20 *Supplemental information about subjects and the study design*

21 LR- and HR-subjects from the case:control study were selected from the Spanish AIDS  
22 Research Network (RIS) cohort CoRIS (1) and associated samples were obtained from  
23 the RIS-BB (2). Additional LR- and HR-subjects were HIV-infected subjects visiting  
24 the Infectious Diseases Service of the University Hospital Virgen del Rocío between  
25 2003 and 2013. The supplementary group of HIV-infected subjects used for the  
26 correlation between paired data of CD4/CD8 ratios, calculated by both absolute counts  
27 and cytometry frequencies, was also from the Infectious Diseases Service of the  
28 University Hospital Virgen del Rocío.

29 *Laboratory measurements*

30 For the case:control study, clinical and demographic data from HIV-infected individuals  
31 were obtained from CoRIS (1). For subjects from the Virgen del Rocío Hospital, the  
32 absolute numbers of CD4 and CD8 T-cells were determined in fresh blood with an  
33 Epics XL-MCL flow cytometer (Beckman Coulter) and plasma HIV-1 RNA levels were  
34 measured by quantitative PCR (COBAS Ampliprep/COBAS Taqman HIV-1 test, Roche  
35 Molecular Systems), according to the manufacturer's instructions. The detection limit  
36 for this assay was 40 HIV RNA copies/mL. Plasma samples were also tested for  
37 Hepatitis C virus antibodies using an HCV ELISA (Siemens Healthcare Diagnosis).

38 *Flow-Cytometry*

39 Briefly, thawed PBMCs were incubated at 4°C with surface marker antibodies for 20  
40 minutes, followed by fixation and permeabilization according to the manufacturer's  
41 instructions (FoxP3/Transcription Factor Staining Buffer, Ebioscience), and

42 subsequently incubated with intracellular FoxP3 for 30 minutes. Viable cells were  
43 identified using LIVE/DEAD fixable Aqua Blue Dead Cell Stain (Life Technologies,  
44 USA). Antibodies used were: anti-CD3, anti-CD4, anti-FoxP3, anti-ki67, anti-CD95  
45 (BD Biosciences, USA) and anti-CD45RA (Life Technologies, CA, USA). Isotype  
46 controls for FoxP3, Ki67 and CD95 were included in each experiment. Flow cytometry  
47 was performed on LSR Fortessa (BD, USA), and a minimum of  $1 \times 10^6$  total events was  
48 collected. Analysis was performed using FlowJo version 9.2 (Tree Star) and data is  
49 expressed as frequencies and MFI (Mean Fluorescence Intensity). Regulatory T-cells  
50 (Treg) were defined using Miyara's phenotype for activated/effector Treg  
51 ( $CD4+CD45RA-FoxP3^{high}$ ) (3).

#### 52 *Determination of viral tropism*

53 V3 loop amplification and sequencing were performed as previously described (4). The  
54 V3 sequences were interpreted using the bioinformatics genotypic tropism predictor  
55 geno2pheno (G2P), which is freely available online ([http://coreceptor.bioinf.mpi-  
57 inf.mpg.de/index.php](http://coreceptor.bioinf.mpi-<br/>56 inf.mpg.de/index.php)). A clonal version of G2P with false-positive rates (FPR) of 5%  
58 (G2P5%clo) was used. HIV-1 variants were classified as R5 or X4, with the latter  
59 classification including pure X4 and dual-tropic viruses.

#### 59 References

- 60 1. Caro-Murillo, A.M., Castilla, J., Pérez-Hoyos, S., Miró, J.M., Podzamczer, D.,  
61 Rubio, R., Riera, M., Viciano, P., López Aldeguez, J., Antonio Iribarren, J., los Santos-  
62 Gil, I. De, Gómez-Sirvent, J.L., Berenguer, J., Gutiérrez, F., Saumoy, M., Segura, F.,  
63 Soriano, V., Peña, A., Pulido, F., Antonio Oteo, J., Leal, M., Casabona, J., del Amo, J.,  
64 Moreno, S., CoRIS. Cohorte RIS de pacientes con infección por VIH sin tratamiento  
65 antirretroviral previo (CoRIS): metodología y primeros resultados. *Enferm. Infecc.*  
66 *Microbiol. Clin.* **2007**; 25: 23–31.
- 67 2. Garcia-Merino, I., de las Cuevas, N., Jimenez, J.L., Gallego, J., Gomez, C., Prieto,  
68 C., Serramia, M.J., Lorente, R., Munoz-Fernandez, M.A., (Shivbb), S.H.B. The Spanish  
69 HIV BioBank: a model of cooperative HIV research. *Retrovirology* **2009**; 6: 27.

70 3. Miyara M, Yoshioka Y, Kitoh A, *et al.* Functional delineation and differentiation  
71 dynamics of human CD4<sup>+</sup> T cells expressing the FoxP3 transcription factor. *Immunity*  
72 **2009**; 30:899–911

73 4. Romero-Sánchez MC, Alvarez-Ríos AI, Bernal-Morell E *et al.* Maintenance of  
74 virologic efficacy and decrease in levels of  $\beta$ 2-microglobulin, soluble CD40L and  
75 soluble CD14 after switching previously treated HIV-infected patients to an NRTI-  
76 sparing dual therapy. *Antiviral Res* **2014**; 111: 26-32.

77

- 78 **Annex: Centers and investigators involved in CoRIS**
- 79 **Executive committee:** Santiago Moreno, Julia del Amo, David Dalmau, Maria Luisa Navarro, Maria  
80 Isabel González, Jose Luis Blanco, Federico Garcia, Rafael Rubio, Jose Antonio Iribarren, Félix Gutiérrez,  
81 Francesc Vidal, Juan Berenguer, Juan González.
- 82 **Fieldwork, data management and analysis:** Paz Sobrino, Victoria Hernando, Belén Alejos, Débora  
83 Álvarez, Inma Jarrín, Yaiza Rivero, Cristina González.
- 84 **BioBank HIV:** M Ángeles Muñoz-Fernández, Isabel García-Merino, Coral Gómez Rico, Jorge Gallego de  
85 la Fuente y Almudena García Torre.
- 86
- 87 **Participating centres:**
- 88 **Hospital General Universitario de Alicante (Alicante):** Joaquín Portilla, Esperanza Merino, Sergio Reus,  
89 Vicente Boix, Livia Giner, Carmen Gadea, Irene Portilla, Maria Pampliega, Marcos Díez, Juan Carlos  
90 Rodríguez, Jose Sánchez-Payá.
- 91 **Hospital Universitario de Canarias (San Cristobal de la Laguna):** Juan Luis Gómez, Jehovana  
92 Hernández, María Remedios Alemán, María del Mar Alonso, María Inmaculada Hernández,  
93 Felicitas Díaz-Flores, Dácil García, Ricardo Pelazas. , Ana López Lirola.
- 94 **Hospital Universitario Central de Asturias (Oviedo):** Victor Asensi, Eulalia Valle, José Antonio  
95 Cartón., Maria Eugenia Rivas Carmenado.
- 96 **Hospital Universitario 12 de Octubre (Madrid):** Rafael Rubio, Federico Pulido, Otilia Bisbal,  
97 Asunción Hernando, Maria Lagarde, Mariano Matarranz, Lourdes Dominguez, Laura Bermejo,  
98 Mireia Santacreu.
- 99 **Hospital Universitario de Donostia (Donostia-San Sebastián):** José Antonio Iribarren, Julio  
100 Arrizabalaga, María José Aramburu, Xabier Camino, Francisco Rodríguez-Arrondo, Miguel  
101 Ángel von Wichmann, Lidia Pascual Tomé, Miguel Ángel Goenaga, M<sup>a</sup> Jesús Bustinduy, Harkaitz  
102 Azkune Galparsoro. , Maialen Ibarguren, Maitane Umeretz.
- 103 **Hospital General Universitario De Elche (Elche):** Félix Gutiérrez, Mar Masiá, Sergio Padilla,  
104 Andrés Navarro, Fernando Montolio, Catalina Robledano, Joan Gregori Colomé, Araceli Adsuar,  
105 Rafael Pascual, Marta Fernández, Elena García., Jose Alberto García , Xavier Barber.
- 106 **Hospital General Universitario Gregorio Marañón (Madrid):** Juan Berenguer, Juan Carlos  
107 López Bernaldo de Quirós, Pilar Miralles, Isabel Gutiérrez, Margarita Ramírez, Belén Padilla,  
108 Paloma Gijón, Ana Carrero, Teresa Aldamiz-Echevarría, Francisco Tejerina, Francisco Jose  
109 Parras, Pascual Balsalobre, Cristina Diez.
- 110 **Hospital Universitari de Tarragona Joan XXIII (Tarragona):** Francesc Vidal, Joaquín Peraire,  
111 Consuelo Viladés, Sergio Veloso, Montserrat Vargas, Miguel López-Dupla, Montserrat Olona,  
112 Anna Rull, Esther Rodriguez-Gallego, Verónica Alba.
- 113 **Hospital Universitario y Politécnico de La Fe (Valencia):** Marta Montero Alonso, José López  
114 Aldeguer, Marino Blanes Juliá, Mariona Tacias Pitarch, Iván Castro Hernández, Eva Calabuig  
115 Muñoz, Sandra Cuéllar Tovar, Miguel Salavert Lletí, Juan Fernández Navarro.

- 116 **Hospital Universitario La Paz (Madrid):** Juan González, Ignacio Bernardino de la Serna, José  
117 Ramón Arribas, María Luisa Montes, Jose M<sup>a</sup> Peña, Blanca Arribas, Juan Miguel Castro, Fco  
118 Javier Zamora, Ignacio Pérez, Miriam Estébanez, Silvia García, Marta Díaz, Natalia Stella  
119 Alcáriz, Jesús Mingorance, Dolores Montero, Alicia González, Maria Isabel de José.
- 120 **Hospital Universitari MutuaTerrassa (Terrasa):** David Dalmau, Angels Jaén, Montse Sanmartí,  
121 Mireia Cairó, Javier Martinez-Lacasa, Pablo Velli, Roser Font, Mariona Xercavins, Noemí  
122 Alonso.
- 123 **Hospital Universitario de La Princesa (Madrid):** Ignacio de los Santos, Jesús Sanz Sanz, Ana  
124 Salas Aparicio, Cristina Sarriá Cepeda, Lucio Garcia-Fraile Fraile.
- 125 **Hospital Universitario Ramón y Cajal (Madrid):** Santiago Moreno, José Luis Casado,  
126 Fernando Drona, Ana Moreno, María Jesús Pérez Elías, Cristina Gómez Ayerbe, Carolina  
127 Gutiérrez, Nadia Madrid, Santos del Campo Terrón, Paloma Martí, Uxua Ansa, Sergio Serrano,  
128 Maria Jesús Vivancos.
- 129 **Hospital General Universitario Reina Sofía (Murcia):** Alfredo Cano, Enrique Bernal, Ángeles  
130 Muñoz.
- 131 **Hospital Nuevo San Cecilio (Granada):** Federico García, José Hernández, Alejandro Peña,  
132 Leopoldo Muñoz, Ana Belén Pérez, Marta Alvarez, Natalia Chueca, David Vinuesa, Jose Angel  
133 Fernández.
- 134 **Centro Sanitario Sandoval (Madrid):** Jorge Del Romero, Carmen Rodríguez, Teresa Puerta,  
135 Juan Carlos Carrió, Mar Vera, Juan Ballesteros.
- 136 **Hospital Universitario Son Espases (Palma de Mallorca):** Melchor Riera, Maria Peñaranda,  
137 Maria Leyes, M<sup>a</sup> Angels Ribas, Antoni A Campins, Carmen Vidal, Francisco Fanjul, Javier  
138 Murillas, Francisco Homar.
- 139 **Hospital Universitario Virgen de la Victoria (Málaga):** Jesús Santos, Manuel Márquez, Isabel  
140 Viciano, Rosario Palacios, Isabel Pérez, Carmen Maria González.
- 141 **Hospital Universitario Virgen del Rocío (Sevilla):** Pompeyo Viciano, Nuria Espinosa, Luis  
142 Fernando López-Cortés.
- 143 **Hospital Universitario de Bellvitge (Hospitalet de Llobregat):** Daniel Podzamczar, Elena Ferrer,  
144 Arkaitz Imaz, Juan Tiraboschi, Ana Silva, Maria Saumoy.
- 145 **Hospital Costa del Sol (Marbella):** Julián Olalla, Alfonso del Arco, Javier de la torre, José Luis  
146 Prada, José María García de Lomas Guerrero.
- 147 **Hospital General Universitario Santa Lucía (Cartagena):** Onofre Juan Martínez, Francisco Jesús  
148 Vera, Lorena Martínez, Josefina García, Begoña Alcaraz, Amaya Jimeno.
- 149 **Complejo Hospitalario Universitario a Coruña (Chuc) (A Coruña):** Eva Poveda, Berta Pernas,  
150 Álvaro Mena, Marta Grandal, Ángeles Castro, José D. Pedreira.

- 151 **Hospital Universitario Virgen de la Arrixaca (El Palmar):** Carlos Galera, Helena Albendin,  
152 Aurora Pérez, Asunción Iborra, Antonio Moreno, Maria Ángeles Campillo, Asunción Vidal.
- 153 **Hospital Universitario Infanta Sofia (San Sebastian de los Reyes):** Inés Suárez-García, Eduardo  
154 Malmierca.
- 155 **Complejo Hospitalario de Jaén (Jaen):** Mohamed Omar Mohamed-Balghata, Maria Amparo  
156 Gómez Vidal.
